# Supplementary material
Source: PubMed Central journal article supplement (PMC1820693)

C57

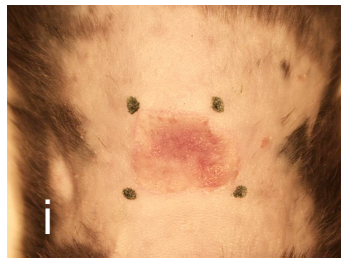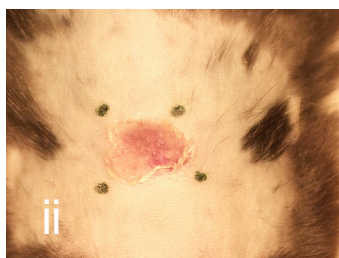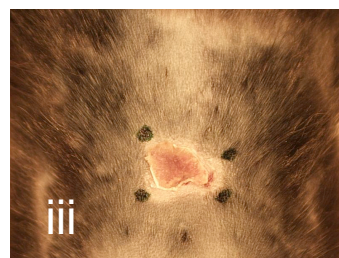

RAG-Saline

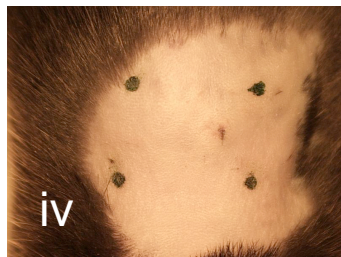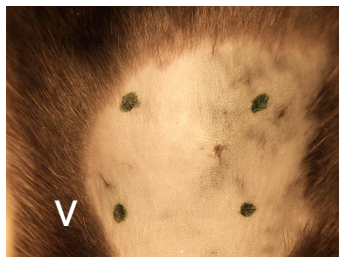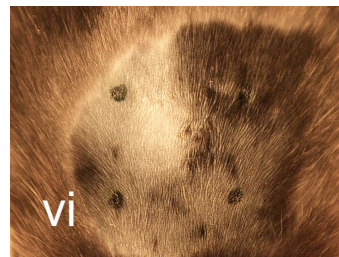

RAG-CM75

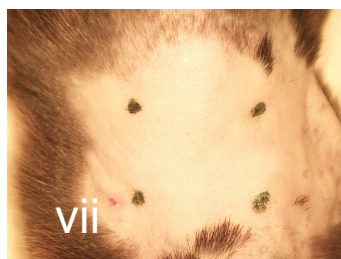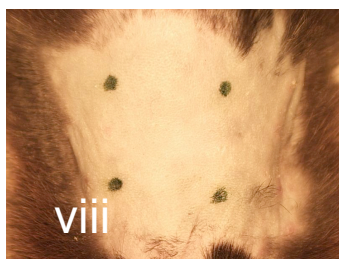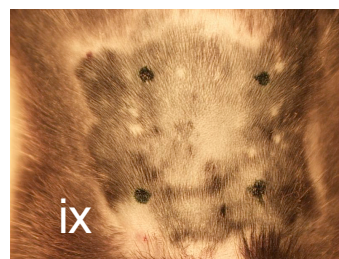

RAG-CM22

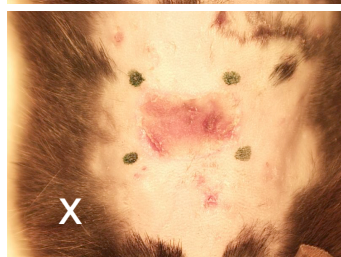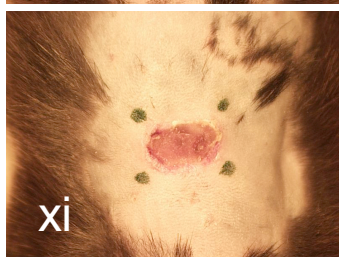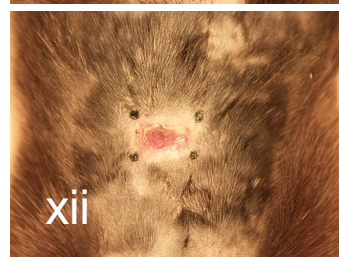

Day 3

Day 7

Day 10

Supplement: pnas_0609026104_1.pdf [file pnas_0609026104_1.pdf]

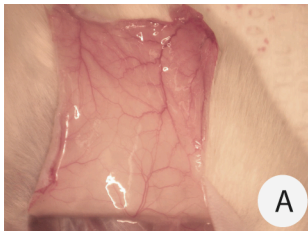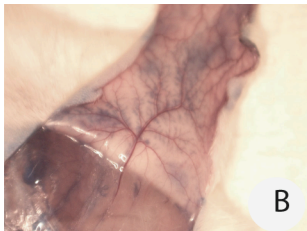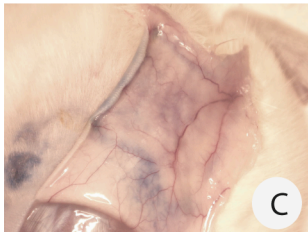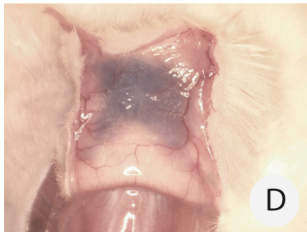

Supplement: pnas_0609026104_2.pdf [file pnas_0609026104_2.pdf]

C57-  
Control  
Peptide

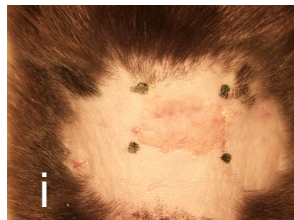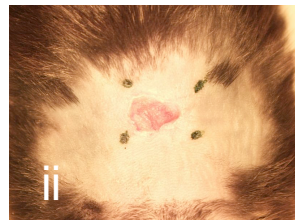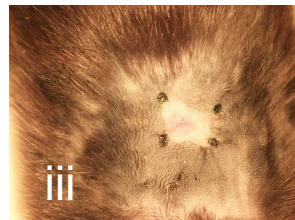

C57-  
Saline

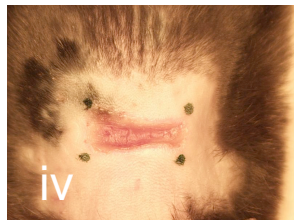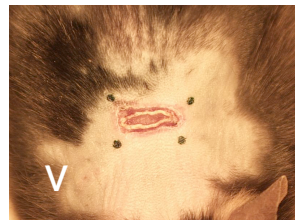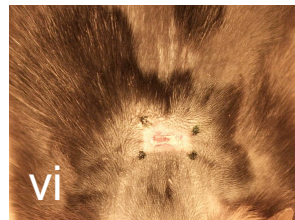

C57-  
N2 Peptide

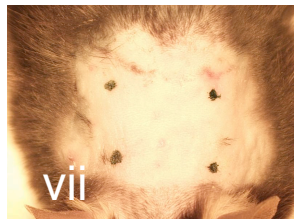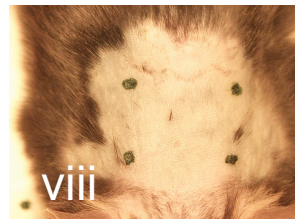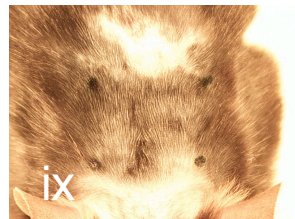

Day 3

Day 7

Day 10

Supplement: pnas_0609026104_3.pdf [file pnas_0609026104_3.pdf]
